# Supplementary material for: Building school-based social capital through ‘We Act - Together for Health’ – a quasi-experimental study
Source: Springer Nature journal article supplement (doi:10.1186/s12889-018-6026-0), 2018-09-26
Supplement: MOESM1 [file 16154224]

Additional File 1: Dropout by groups of baseline (only) respondents compared to baseline and follow-up respondents

| <b>Characteristics</b>                                            | <b>Group 1: Baseline (only)</b> | <b>Group 2: Baseline and follow-up</b> | <b>p-value<sup>a</sup></b> |
|-------------------------------------------------------------------|---------------------------------|----------------------------------------|----------------------------|
| Class (5th/6th) (% 5th grade)                                     | 31/16 (66%) n=47                | 345/203 (63%) n=548                    | 0.68                       |
| Gender (boys/girls) (% girls)                                     | 25/22 (53%) n=47                | 260/288 (53%) n=548                    | 0.45                       |
| Migration status (Native Dane/Migrant Dane) (%Native Dane)        | 37/10 (79%) n=47                | 468/80 (85%) n=548                     | 0.22                       |
| Socioeconomic status (high, middle, low, unclassifiable) (% high) | 14/18/10/5 (30%) n=47           | 192/205/78/73 (35%) n=548              | 0.21                       |
| Baseline horizontal social capital (low, moderate, high) (% high) | 7/14/26 (55%) n=47              | 93/130/325 (59%) n=548                 | 0.64                       |
| Baseline vertical social capital (low, moderate, high) (% high)   | 12/6/29 (62%) n=47              | 70/87/391 (71%) n=548                  | 0.05*                      |
| Baseline sense of belonging (low, moderate, high) (% high)        | 7/10/30 (64%) n=47              | 119/71/357 (65%) n=547                 | 0.21                       |

<sup>a</sup> based on chi-square test, \* p≤ 0.05; \*\* p≤ 0.01 \*\*\*; p≤ 0.001
